# Supplementary material
Source: ML conference proceedings conference paper supplement (https://proceedings.mlr.press/v37/bachman15.html)
Supplement: Supplementary file 1 [file bachman15-supp.pdf]

# Appendix for Variational Generative Stochastic Networks with Collaborative Shaping

Philip Bachman and Doina Precup  
School of Computer Science, McGill University

## Explaining the Variational Free-Energy

Given distributions  $p_\theta(x|z)$ ,  $q_\phi(z|x)$ , and  $p_*(z)$ , we can define several *derived distributions*:

$$p_\theta(x; p_*) = \sum_z p_\theta(x|z) p_*(z) \quad (1)$$

$$p_\theta(z|x; p_*) = \frac{p_\theta(x|z) p_*(z)}{p_\theta(x; p_*)} \quad (2)$$

$$p_\theta(x, z; p_*) = p_\theta(x|z) p_*(z) = p_\theta(z|x; p_*) p_\theta(x; p_*) \quad (3)$$

Given these distributions, we now work “backwards” from  $\log p_\theta(x; p_*)$ :

$$\log p_\theta(x; p_*) = \sum_z q_\phi(z|x) \log p_\theta(x; p_*) \quad (4)$$

$$= \sum_z q_\phi(z|x) \log \frac{p_\theta(z|x; p_*) p_\theta(x; p_*)}{p_\theta(z|x; p_*)} \quad (5)$$

$$= \sum_z q_\phi(z|x) \log \frac{p_\theta(x, z; p_*)}{p_\theta(z|x; p_*)} \quad (6)$$

$$= \sum_z q_\phi(z|x) (\log p_\theta(x, z; p_*) - \log q_\phi(z|x) + \log q_\phi(z|x) - \log p_\theta(z|x; p_*)) \quad (7)$$

$$= \sum_z q_\phi(z|x) \log \frac{p_\theta(x, z; p_*)}{q_\phi(z|x)} + \sum_z q_\phi(z|x) \log \frac{q_\phi(z|x)}{p_\theta(z|x; p_*)} \quad (8)$$

$$= \sum_z q_\phi(z|x) \left( \log p_\theta(x|z) + \log \frac{p_*(z)}{q_\phi(z|x)} \right) + \text{KL}(q_\phi(z|x) || p_\theta(z|x; p_*)) \quad (9)$$

$$\geq \sum_z q_\phi(z|x) \log p_\theta(x|z) - \text{KL}(q_\phi(z|x) || p_*(z)) \quad (10)$$

$$\geq -\mathcal{F}(x; q_\phi, p_\theta, p_*) \quad (11)$$

where Eqns. 10-11 define the variational free-energy:

$$\mathcal{F}(x; q_\phi, p_\theta, p_*) = - \sum_z q_\phi(z|x) \log p_\theta(x|z) \tag{12}$$

$$\begin{aligned} &+ \text{KL}(q_\phi(z|x)||p_*(z)) \\ &\geq - \log p_\theta(x; p_*) \end{aligned} \tag{13}$$

These equations follow from simple algebraic manipulation and Eqn. 9-10 comes from non-negativity and definition of KL. In this derivation of the variational free-energy, we treated  $p_\theta$ ,  $q_\phi$ , and  $p_*$  simply as computational mechanisms for producing valid distributions over the appropriate spaces. This emphasizes the fact that, for any triplet of distributions  $(p_\theta, q_\phi, p_*)$ ,  $\mathcal{F}(x; q_\phi, p_\theta, p_*)$  can be computed and gives a lower-bound on  $\log p_\theta(x; p_*)$  for the *derived distribution*  $p_\theta(x; p_*)$ .

Note that the derived distributions we used result strictly from interactions between  $p_\theta(x|z)$  and  $p_*(z)$ , and are independent of  $q_\phi(z|x)$ . Therefore, we could change the domain of  $q_\phi(z|x)$  to some alternate, arbitrary space  $\mathcal{Y}$  such that  $q_\phi(z|y)$  produces distributions over  $\mathcal{Z}$  given inputs from  $\mathcal{Y}$ . Plugging such a  $q_\phi$  into Eqn. 12 (and substituting some  $ys$  for some  $xs$  appropriately) still produces a valid free-energy  $\mathcal{F}(x, y; q_\phi, p_\theta, p_*)$ , which still upper-bounds the negative log-likelihood of  $x$  under  $p_\theta(x; p_*)$ . We refer to the resulting system comprising  $q_\phi(z|y)$ ,  $p_\theta(x|z)$ , and  $p_*(z)$  as a variational transcoder.

Variational transcoding is a very general mechanism which encompasses standard variational auto-encoders, where  $\mathcal{Y} = \mathcal{X}$ , and methods for sequence-to-sequence learning, image-to-text generation, Bayesian classification, etc. E.g., the sequence-to-sequence learning method in [?] can be interpreted as a variational transcoder in which  $p_\theta(x|z)/q_\theta(z|y)$  are constructed from LSTMs,  $p_*(z)$  is, e.g., an isotropic Gaussian distribution over  $\mathcal{Z}$ , and the distributions output by  $q_\phi(z|y)$  are fixed to be Dirac deltas over  $\mathcal{Z}$ .
